# Supplementary material
Source: Copernicus journal article supplement (doi:10.5194/egusphere-2026-3709)
Supplement: Supplementary file 1 [file egusphere-2026-3709-supplement.pdf]

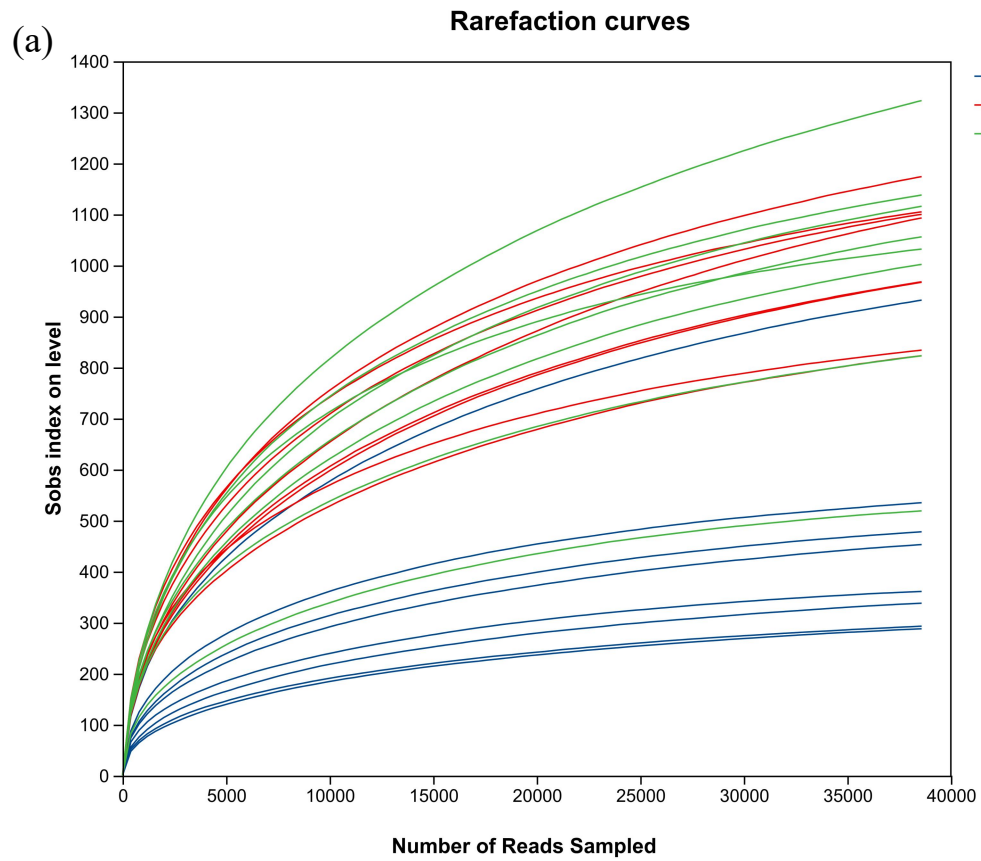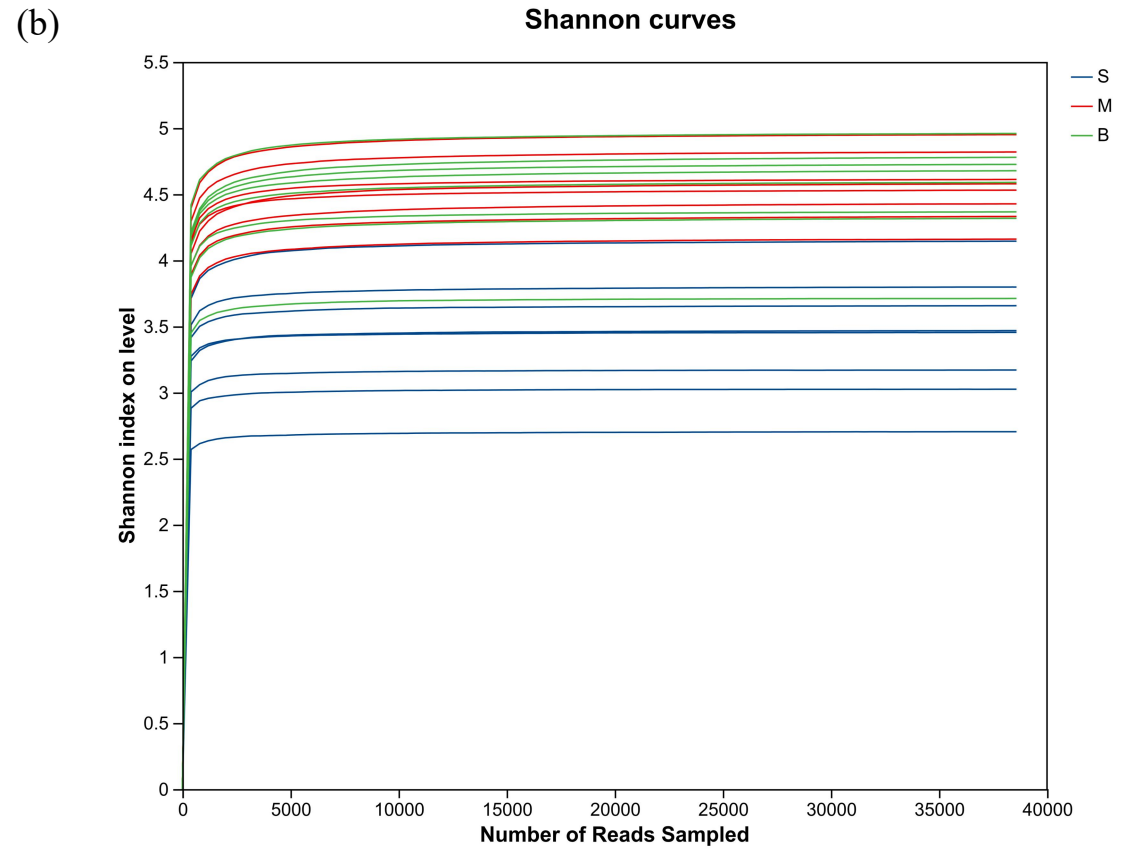

Figure S1: Rarefaction curves (a) and Shannon index curves (b) of bacterial OTUs clustered at 97% sequence similarity across surface (S), middle (M) and bottom (B) water samples.

| STATION_NAME | NH4+  | SiO2-Si | DO        | PO43- | NO2-  | D    | chl a | L |
|--------------|-------|---------|-----------|-------|-------|------|-------|---|
| R11_S        | 0.442 | 25      | 917.44603 | 134   | 5.31  | 0    | 0.02  | 1 |
| R12_S        | 0.8   | 144     | 821.17523 | 19.7  | 0.43  | 0    | 0     | 1 |
| R13_S        | 8.11  | 175     | 869.22234 | 134   | 0     | 0    | 0.34  | 1 |
| R16_S        | 0     | 142     | 962.90594 | 21.2  | 0     | 0    | 3.61  | 1 |
| P1_07_S      | 4.87  | 144     | 813.58941 | 27.3  | 0     | 0    | 0.02  | 1 |
| P2_04_S      | 2.55  | 148     | 840.77098 | 22.3  | 0     | 0    | 0     | 1 |
| P2_05_S      | 0.643 | 154     | 805.44645 | 28.6  | 0     | 0    | 0.01  | 1 |
| P2_08_S      | 8.2   | 124     | 791.7394  | 74.9  | 0     | 0    | 0     | 1 |
| R11_M        | 1.61  | 1334    | 529.81933 | 43    | 0.72  | 100  | 0.02  | 0 |
| R12_M        | 0     | 1005    | 612.39843 | 60.7  | 0.777 | 100  | 0     | 0 |
| R13_M        | 0     | 787     | 529.17597 | 43    | 0.314 | 150  | 0.01  | 0 |
| R16_M        | 0     | 250     | 601.17142 | 26.9  | 0     | 200  | 0.01  | 0 |
| P1_07_M      | 0     | 725     | 528.45648 | 43.3  | 0.4   | 200  | 0     | 0 |
| P2_04_M      | 0     | 154     | 605.56987 | 29.4  | 0     | 500  | 0     | 0 |
| P2_05_M      | 0     | 389     | 537.86067 | 40.2  | 0     | 200  | 0     | 0 |
| P2_08_M      | 0     | 244     | 601.97788 | 28    | 0     | 500  | 0     | 0 |
| R11_B        | 1.34  | 1593.2  | 514.67    | 41.4  | 1.13  | 162  | 0     | 0 |
| R12_B        | 0.944 | 750     | 511.04    | 43.3  | 1.74  | 170  | 0     | 0 |
| R13_B        | 0     | 736     | 525.46    | 41.4  | 0.864 | 164  | 0.01  | 0 |
| R16_B        | 0     | 184     | 605.11    | 28.3  | 0     | 515  | 0     | 0 |
| P1_07_B      | 0     | 219     | 609.23    | 26.5  | 0.633 | 575  | 0     | 0 |
| P2_04_B      | 0     | 214     | 604.36    | 29.9  | 0     | 1076 | 0     | 0 |
| P2_05_B      | 0     | 124     | 604.16    | 27.7  | 0     | 544  | 0     | 0 |
| P2_08_B      | 1.85  | 256     | 617.89    | 45.4  | 0     | 1175 | 0     | 0 |

NO2-: Nitrite; PO4 3-: Phosphate; SiO2-Si: Silicate; NH4+: Ammonium nitrogen;L: Light; D:Depth; DO: dissolved oxygen

Table. S1 Physical and chemical properties in 8 Stations.

| <b>Variable</b> | <b>R<sup>2</sup></b> | <b>P_value</b> |
|-----------------|----------------------|----------------|
| <b>Depth_m</b>  | 0.6515               | 0.001          |
| <b>DO</b>       | 0.5066               | 0.003          |
| <b>SiO2</b>     | 0.4454               | 0.003          |
| <b>NH4</b>      | 0.378                | 0.004          |
| <b>PO4_P</b>    | 0.1929               | 0.087          |
| <b>NO2_N</b>    | 0.1137               | 0.27           |
| <b>chl_a</b>    | 0.09                 | 0.404          |

Table. S2 Screening results of environmental factors using envfit with Monte Carlo permutation tests (n = 999 permutations). R<sup>2</sup> represents the explanatory power of environmental variables for microbial community structure, and P-values were determined by Monte Carlo permutation tests.
